# Supplementary material
Source: MDPI journal article supplement (https://www.mdpi.com/2077-0472/12/5/724)
Supplement: s1 [file s1]

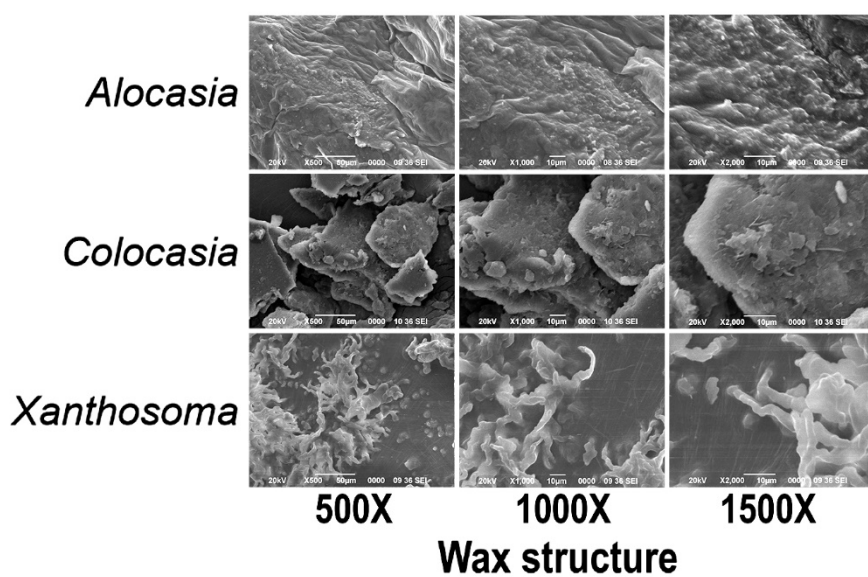

**Figure S1.** SEM images of cuticular wax structures of *Alocasia* (A), *Colocasia* (B), and *Xanthosoma* (C) at 500×, 1000×, and 2000×.

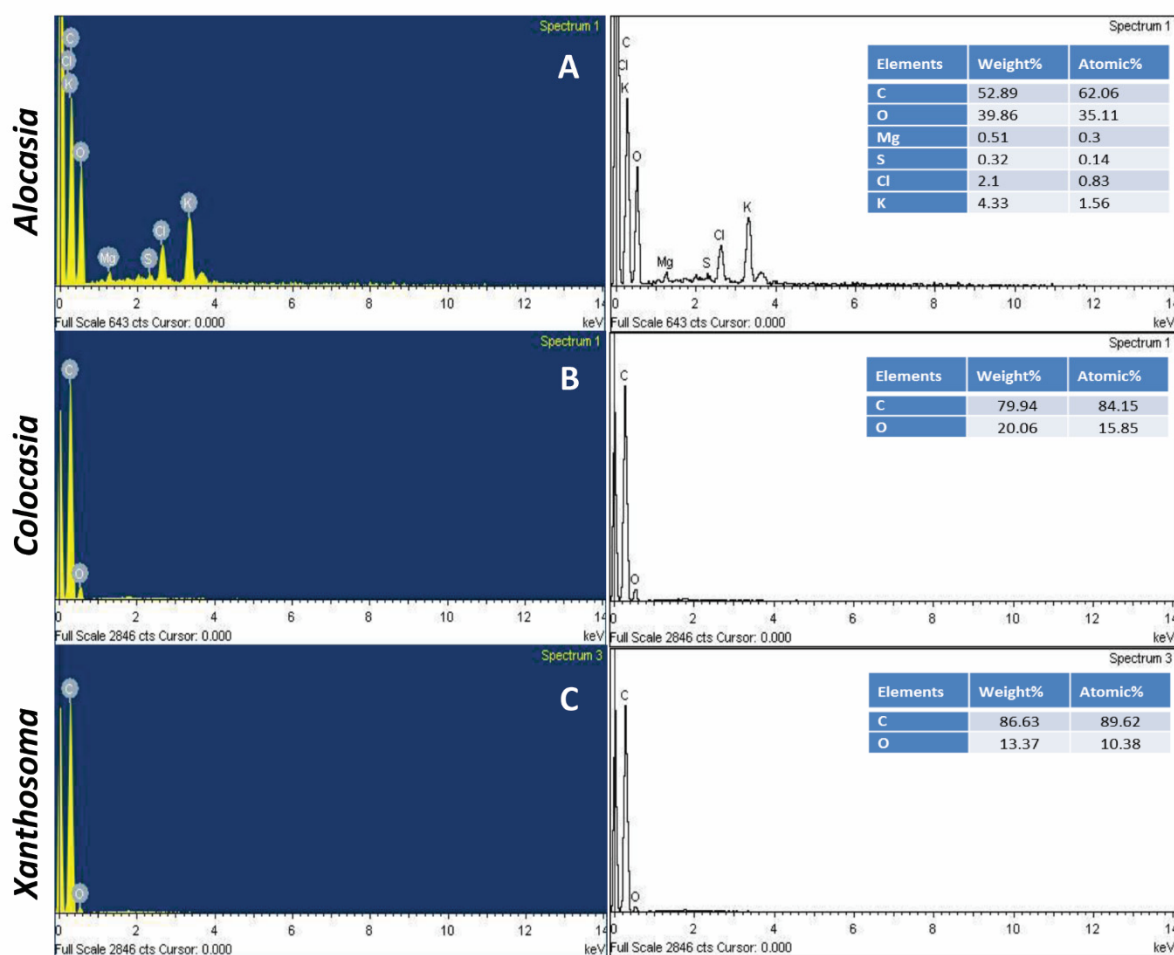

**Figure S2.** Elemental composition analysis of *Alocasia* (A), *Colocasia* (B), and *Xanthosoma* (C) cuticular wax using SEM-EDX

**Table S1:** Analysis of variance (mean sum of squares) for the leaf physiological properties of three aroid species, *Alocasia*, *Colocasia* and *Xanthosoma* as influenced by leaf cuticular wax in a complete randomized design (CRD)

| Source                            | Mean sum of squares (MSS) |       |
|-----------------------------------|---------------------------|-------|
|                                   | Species                   | Error |
| <i>df</i>                         | 2                         | 21    |
| Wax content                       | 248.59**                  | 4.16  |
| Sun protecting factor (SPF)       | 225.18**                  | 42.15 |
| Contact angle (CA)                | 8249.1**                  | 29.8  |
| Chlorophyll content (Ch)          | 306.38**                  | 2.91  |
| Chlorophyll stability index (CSI) | 4000.6**                  | 175.7 |
| <i>l</i> * values                 | 176.35**                  | 4.30  |
| <i>a</i> * values                 | 50.00**                   | 0.99  |
| <i>b</i> * values                 | 116.64**                  | 5.11  |
| Relative water content (RWC)      | 862.14**                  | 65.53 |
| Cell membrane injury (CMI)        | 0.239**                   | 0.003 |

\*\* indicates the level of significance at  $P \leq 0.01$
